# Supplementary material for: Macro and micro plastics sorb and desorb metals and act as a point source of trace metals to coastal ecosystems
Source: PLoS One. 2018 Feb 14;13(2):e0191759. doi: 10.1371/journal.pone.0191759 (PMC5812603; doi:10.1371/journal.pone.0191759)
Supplement: S1 File — (XLSX) [file pone.0191759.s001.xlsx]

## Sheet: Location
Number of samples	Weight	Location	Cu (mg/g metals)	Zn (mg/g metals)	Pb(mg/g metals)	Cd (mg/g metals)
1	1.01	1	0.00664679	0.000815637	0.000247241	0.00011163
3	0.34	1	0.00751672	0.00699305	0.000988251	0.000119204
4	1.01	1	0.00273649	0.00106057	0.000405512	6.82097e-05
5	1.01	1	0.000284268	0.023762	0.00174868	7.93324e-05
6	1	1	0.00214689	0.00247338	0.00122755	4.89258e-05
7	0.46	1	0.00136305	0.00218525	0.000615044	0.000103927
8	1.02	1	0.00278433	0.00521399	0.00103497	4.98486e-05
9	0.35	1	0.00214184	0.00552941	0.00173284	0.000121777
10	0.31	1	0.00573659	0.00708724	0.00273867	0.000190649
11	1.01	1	0.0392253	0.00408726	0.00115388	7.01182e-05
12	1.01	1	0.00420893	0.00399935	0.00176743	5.85431e-05
13	1.01	1	0.00996646	0.0112156	0.000550964	6.13706e-05
14	0.8	1	0.000951109	0.00160927	0.000611365	6.16947e-05
15	1.02	1	0.0389285	0.00039854	0.000666755	4.31913e-05
16	0.16	2	0.00501152	0.017136	0.00219779	0.000241543
17	0.98	2	0.00265632	0.642163	0.000814669	5.3067e-05
18	0.148	2	0.00470058	0.0226898	0.00109417	0.000308671
19	1.03	2	0.00884304	0.0813941	0.0968987	7.29639e-05
20	0.396	2	0.00157979	0.00478945	0.0126225	9.53071e-05
21	0.3673	2	0.047444	0.00716241	0.00447211	0.000169966
22	0.0447	2	0.0313192	0.0259737	0.00162464	0.000912976
23	0.079	2	0.0072217	0.026778	0.00993286	0.000633779
24	0.79	2	0.00262934	0.53796	0.00347074	0.000310049
25	1.02	2	0.00225601	0.0051251	0.00220415	0.000161134
26	1	2	0.00560546	0.0302975	0.00192481	6.51045e-05
27	1.03	2	0.00379218	0.0258011	0.00664672	0.000106924
28	1.01	2	0.00319843	0.50235	0.00255541	4.31377e-05
29	0.327	2	0.00612745	0.0116466	0.00379762	0.000158724
30	1.1	3	0.00108973	0.00244315	0.00124242	4.36159e-05
31	1	3	0.00420718	0.00995786	0.00571489	8.39658e-05
33	0.44	3	0.00230604	0.0076733	0.00136485	0.000112455
34	0.038	3	0.028473	0.0344446	0.015091	0.00209778
35	0.996	3	0.000529052	0.00124954	0.000323543	6.57804e-05
36	0.142	3	0.00616908	0.0163837	0.00014157	0.000405459
37	1	3	0.00711256	0.0171819	0.00575256	9.62122e-05
38	0.99	3	0.000723257	0.00250488	0.000257866	2.6146e-05
39	1.07	3	0.0038292	0.00249326	0.000528621	5.65177e-05
40	0.472	3	0.00661939	0.00821879	0.00322022	0.000107394
41	0.196	3	0.00356362	0.0237143	0.00327025	0.000335288
42	0.58	3	0.00416121	0.0655731	0.0104864	0.000185408
43		3
44	1.216	3	0.000334164	0.00130403	0.000249012	3.72022e-05
45	0.109	3	0.00338719	0.039942	0.00197721	0.000417697
46	1.296	3	0.000103369	0.000639713	0.000369251	4.32754e-05
47	0.024	3	0.188124	66.9092	698.057	0.0932224
48	0.813	3	0.00147588	0.00331758	0.00335716	7.24139e-05
49	0.546	3	0.00213042	0.00322626	0.00297423	0.000113125
50	0.137	4	0.00136602	0.00610391	0.00671973	0.000349578
51	0.77	4	0.000502031	0.00162285	0.00187359	7.95794e-05
52	0.0997	4	0.00664935	0.0135695	0.00553472	0.000568208
53	0.966	4	0.00326907	0.00385425	0.00247842	6.03821e-05
54	0.0682	4	0.0109899	0.0230983	0.002289	0.000600222
55	0.0505	4	0.0287569	0.0173739	0.01755	0.000887263
56	0.304	4	0.0023057	0.00412929	0.000929261	0.000167782
57	0.73	4	0.00311344	0.0210931	0.00153035	9.05045e-05
58	0.135	4	0.0125011	0.0279069	0.0034054	0.000337857
59	0.0671	4	0.00406888	0.00926294	-0.00545624	0.000590636
60	1.01	4	0.000381763	0.0022419	0.00210623	0.000159553
61	1.06	4	0.0882359	0.0100134	0.00225649	0.02088
62	0.428	4	0.00879716	0.53719	0.0190572	0.000233694
63	0.356	4	0.000763789	0.00264994	0.00109877	9.40221e-05
64	1.077	4	0.000388981	0.000956967	0.00016746	2.96723e-05
65	0.453	4	0.00307225	0.0143376	0.0014594	0.0001215
66	0.517	4	0.00140679	0.00680813	0.00116448	9.83865e-05
67	0.9435	4	0.000889182	0.000738056	0.000568401	6.07546e-05
68	0.5	4	0.0032766	0.00573587	0.000278137	0.000105199
69	0.734	4	0.00151425	0.0120948	0.000383564	5.87052e-05
70	1.028	4	0.000551706	0.00109795	0.000213491	5.3431e-05
73	0.355	4	0.0035289	0.0121907	0.0010627	0.000131369
74	0.8236	4	0.00330662	0.220038	0.000720855	7.42609e-05
76	1.2169	4	0.00114956	0.00629991	0.000283516	4.45092e-05
77	1.036	5	0.00154776	0.00239606	-1.83408e-05	3.99172e-05
78	0.305	5	0.0298471	0.134831	0.00697658	0.000209809
79	0.0574	5	0.00543702	0.0371217	0.00227221	0.000920846
80	0.012	5	0.048591	0.0303309	0.016605	0.00440287
81	0.241	5	0.000100769	0.0210447	0.00225833	0.000222747
82	1.257	6	0.000739961	0.00183923	0.000432702	3.59284e-05
83	0.804	6	0.000884838	0.0105039	0.000588371	5.66219e-05
84	0.7078	6	0.000523225	0.00144539	0.000357046	5.7533e-05
85	0.822	6	0.000810129	0.0060613	0.00105155	6.78965e-05
86	1.1218	6	0.000237448	0.00168158	0.000830436	3.4341e-05
87	0.554	6	0.000191224	0.00136098	0.0012494	0.000102036
88	0.5163	6	0.000380996	0.0029405	0.000626337	7.91609e-05
89	0.121	6	0.0243613	0.0676317	0.0111632	0.000488939
90	1.188	6	8.5271e-05	0.00152719	0.000430126	4.56142e-05
91	0.58	6	0.000501261	0.00253492	0.000812297	7.62865e-05
92	1.5325	6	0.0002722	0.00137132	0.000426299	2.62106e-05
93	0.967	6	0.000429227	0.00127305	0.000599463	4.73136e-05
94	0.1847	6	0.00269217	0.00540897	0.00329937	0.000316261
95	0.3108	6	0.00237505	0.00736841	0.107975	0.000190448
96	1.1047	6	0.000454414	0.000954705	0.000316497	4.59638e-05
97	0.8665	7	0.00154839	0.0138074	8.37535e-05	5.91588e-05
98	0.152	8	0.0017697	0.00657909	0.0037759	0.000345425
99	0.0677	8	0.00336626	0.00972073	-0.00173743	0.000706141
100	0.951	8	0.000376628	0.00210148	0.000554543	6.24583e-05
101	0.968	8	0.00117245	0.00377278	0.000393718	6.05591e-05
102	1.517	8	0.00160884	0.00194917	0.000285053	3.60311e-05
103	0.0577	8	0.00765719	0.0272106	0.00565027	0.00155049
104	0.2477	8	0.00902842	0.0210805	0.00384601	0.000201828
105	1.148	8	0.00046397	0.00105618	0.00037245	4.66789e-05
106	0.246	8	0.00673552	0.0144373	0.00370824	0.000225531
107	1.145	8	0.000337054	0.00093358	0.000546985	5.00207e-05
108	0.512	8	0.000503843	0.0016371	0.00039891	9.23066e-05
109	0.838	8	0.00125777	0.0169963	0.00131126	4.6426e-05
110	1.1396	8	0.00518741	0.0568975	1.50752	0.00111126
112	0.2315	8	0.0191933	0.086914	0.0577595	0.00167269
113	0.2369	8	0.00390275	0.00919769	0.002443	0.000170725
114	0.6497	8	0.00361289	0.00911635	0.00439576	9.5862e-05
115	1.253	8	0.000892689	0.00398703	0.00113191	0.000148993
116	1.029	8	12.1847	0.643735	0.00446045	0.000179208
117	0.588	8	0.0645407	0.00457506	0.000272447	9.87634e-05
118	1.08	8	0.0119158	0.00851911	0.00257425	0.000186884
119	1.155	8	0.0075594	0.00273034	0.00135495	5.27945e-05
120	1.189	8	0.0053167	0.00108947	5.21447e-05	6.76221e-05
121	1.13	8	0.00309562	0.0030723	0.000371582	7.74896e-05
121 bis	1.034	8	0.00173824	0.00140444	-0.000205566	5.8903e-05
122	0.242	8	0.0112779	0.0149283	0.00645015	0.000225834
123	1.338	8	0.0735426	15.5726	0.0456201	7.37237e-05
124	0.809	8	0.0496105	0.0567173	0.00038101	5.40629e-05
125	0.0277	9	0.0451768	0.0428581	0.0463767	0.00192805
126	0.823	9	0.00137088	0.00476856	0.000824298	4.64313e-05
127	0.7831	9	0.000882435	0.000542309	0.000284286	5.19454e-05
128	0.18	9	0.0111835	0.00818528	0.00124499	0.000248184
129	0.13	9	0.00901077	0.00326055	0.00277505	0.000313589
130	0.975	9	0.00109319	0.000766679	0.000201954	6.32873e-05
131	0.203	9	0.00483708	0.00117201	0.00233993	0.000233121
132	0.0152	9	0.06636	0.0571765	0.0418149	0.00328714
133	0.158	9	0.0100196	0.00629831	0.00167061	0.000295367
134	0.0599	9	0.161333	0.218314	0.00186176	0.000554748
136	0.43	9	0.0138272	0.0262913	0.000829288	8.58411e-05
137	0.724	9	0.0115233	0.0218663	0.000914996	5.73187e-05
138	0.909	9	0.0332813	0.101332	0.0013674	5.83544e-05
139	0.3237	9	0.00800992	0.205491	0.00223548	0.000166645
140	0.3884	9	0.0026825	0.00575732	0.000118867	0.000114373
141	0.1359	9	0.00518358	0.00153376	0.000191532	0.000397264
142	1.0747	9	0.00110311	0.00216328	0.000443259	6.04885e-05
143	0.59	9	0.00359386	0.00376174	0.175731	0.000101567
144	0.322	9	0.0196757	0.0108654	0.00162363	0.000167472
145	0.295	9	0.00269145	0.0024303	0.00101649	0.000182715
146	0.904	9	0.000723589	0.000494521	0.00144187	4.60031e-05
147	0.33	9	0.00674615	0.000857214	0.000385458	0.000149436
148	1.164	9	0.00166147	0.00109733	0.000439396	3.60369e-05
149	1.112	9	0.00226982	0.00105927	0.011043	0.000427702
150	1.116	9	0.000601754	0.000349995	0.000424041	4.83778e-05
The colors correspond to the color of my map

## Sheet: Types
S1. Metal concentrations for all plastics collected from 9 intertidal regions in Burrard Inlet, BC, Canada.
Sample	Polymer	Types	Cu (mg/g metals)	Zn (mg/g metals)	Pb(mg/g metals)	Cd (mg/g metals)
46	aminoplastes	1	0.000103369	0.000639713	0.000369251	4.32754e-05	1
15	HDPE	2	0.0389285	0.00039854	0.000666755	4.31913e-05	2
35	HDPE	2	0.000529052	0.00124954	0.000323543	6.57804e-05	3
112	HDPE	2	0.0191933	0.086914	0.0577595	0.00167269	4
120	HDPE	2	0.0053167	0.00108947	5.21447e-05	6.76221e-05	5
126	HDPE	2	0.00137088	0.00476856	0.000824298	4.64313e-05	6
137	HDPE	2	0.0115233	0.0218663	0.000914996	5.73187e-05	7
145	HDPE	2	0.00269145	0.0024303	0.00101649	0.000182715	8
5	LDPE	3	0.000284268	0.023762	0.00174868	7.93324e-05	9
11	LDPE	3	0.0392253	0.00408726	0.00115388	7.01182e-05	10
13	LDPE	3	0.00996646	0.0112156	0.000550964	6.13706e-05	11
17	LDPE	3	0.00265632	0.642163	0.000814669	5.3067e-05	12
18	LDPE	3	0.00470058	0.0226898	0.00109417	0.000308671	13
33	LDPE	3	0.00230604	0.0076733	0.00136485	0.000112455	14
36	LDPE	3	0.00616908	0.0163837	0.00014157	0.000405459	15
42	LDPE	3	0.00416121	0.0655731	0.0104864	0.000185408	16
43	LDPE	3					17
45	LDPE	3	0.00338719	0.039942	0.00197721	0.000417697	18
57	LDPE	3	0.00311344	0.0210931	0.00153035	9.05045e-05	19
59	LDPE	3	0.00406888	0.00926294	-0.00545624	0.000590636	20
65	LDPE	3	0.00307225	0.0143376	0.0014594	0.0001215	21
66	LDPE	3	0.00140679	0.00680813	0.00116448	9.83865e-05	22
68	LDPE	3	0.0032766	0.00573587	0.000278137	0.000105199	23
69	LDPE	3	0.00151425	0.0120948	0.000383564	5.87052e-05	24
73	LDPE	3	0.0035289	0.0121907	0.0010627	0.000131369	25
79	LDPE	3	0.00543702	0.0371217	0.00227221	0.000920846	26
81	LDPE	3	0.000100769	0.0210447	0.00225833	0.000222747	27
83	LDPE	3	0.000884838	0.0105039	0.000588371	5.66219e-05	28
84	LDPE	3	0.000523225	0.00144539	0.000357046	5.7533e-05	29
89	LDPE	3	0.0243613	0.0676317	0.0111632	0.000488939	30
103	LDPE	3	0.00765719	0.0272106	0.00565027	0.00155049	31
134	LDPE	3	0.161333	0.218314	0.00186176	0.000554748	32
136	LDPE	3	0.0138272	0.0262913	0.000829288	8.58411e-05	33
138	LDPE	3	0.0332813	0.101332	0.0013674	5.83544e-05	34
139	LDPE	3	0.00800992	0.205491	0.00223548	0.000166645	35
140	LDPE	3	0.0026825	0.00575732	0.000118867	0.000114373	36
74	NBR	4	0.00330662	0.220038	0.000720855	7.42609e-05	37
40	nylon	5	0.00661939	0.00821879	0.00322022	0.000107394	38
44	nylon	5	0.000334164	0.00130403	0.000249012	3.72022e-05	39
86	nylon	5	0.000237448	0.00168158	0.000830436	3.4341e-05	40
87	nylon	5	0.000191224	0.00136098	0.0012494	0.000102036	41
88	nylon	5	0.000380996	0.0029405	0.000626337	7.91609e-05	42
93	nylon	5	0.000429227	0.00127305	0.000599463	4.73136e-05	43
114	nylon	5	0.00361289	0.00911635	0.00439576	9.5862e-05	44
147	nylon	5	0.00674615	0.000857214	0.000385458	0.000149436	45
63	PC	6	0.000763789	0.00264994	0.00109877	9.40221e-05	46
64	PC	6	0.000388981	0.000956967	0.00016746	2.96723e-05	47
90	PC	6	8.5271e-05	0.00152719	0.000430126	4.56142e-05	48
127	PC	6	0.000882435	0.000542309	0.000284286	5.19454e-05	49
130	PC	6	0.00109319	0.000766679	0.000201954	6.32873e-05	50
131	PC	6	0.00483708	0.00117201	0.00233993	0.000233121	51
26	PE	7	0.00560546	0.0302975	0.00192481	6.51045e-05	52
27	PE	7	0.00379218	0.0258011	0.00664672	0.000106924	53
41	PE	7	0.00356362	0.0237143	0.00327025	0.000335288	54
53	PE	7	0.00326907	0.00385425	0.00247842	6.03821e-05	55
54	PE	7	0.0109899	0.0230983	0.002289	0.000600222	56
56	PE	7	0.0023057	0.00412929	0.000929261	0.000167782	57
76	PE	7	0.00114956	0.00629991	0.000283516	4.45092e-05	58
85	PE	7	0.000810129	0.0060613	0.00105155	6.78965e-05	59
109	PE	7	0.00125777	0.0169963	0.00131126	4.6426e-05	60
1	PET	8	0.00664679	0.000815637	0.000247241	0.00011163	61
8	PET	8	0.00278433	0.00521399	0.00103497	4.98486e-05	62
70	PET	8	0.000551706	0.00109795	0.000213491	5.3431e-05	63
121	PET	8	0.00309562	0.0030723	0.000371582	7.74896e-05	64
122	PET	8	0.0112779	0.0149283	0.00645015	0.000225834	65
148	PET	8	0.00166147	0.00109733	0.000439396	3.60369e-05	66
48	POM	9	0.00147588	0.00331758	0.00335716	7.24139e-05	67
62	POM	9	0.00879716	0.53719	0.0190572	0.000233694	68
4	PP	10	0.00273649	0.00106057	0.000405512	6.82097e-05	69
14	PP	10	0.000951109	0.00160927	0.000611365	6.16947e-05	70
38	PP	10	0.000723257	0.00250488	0.000257866	2.6146e-05	71
51	PP	10	0.000502031	0.00162285	0.00187359	7.95794e-05	72
80	PP	10	0.048591	0.0303309	0.016605	0.00440287	73
92	PP	10	0.0002722	0.00137132	0.000426299	2.62106e-05	74
96	PP	10	0.000454414	0.000954705	0.000316497	4.59638e-05	75
133	PP	10	0.0100196	0.00629831	0.00167061	0.000295367	76
6	PS	11	0.00214689	0.00247338	0.00122755	4.89258e-05	77
20	PS	11	0.00157979	0.00478945	0.0126225	9.53071e-05	78
39	PS	11	0.0038292	0.00249326	0.000528621	5.65177e-05	79
50	PS	11	0.00136602	0.00610391	0.00671973	0.000349578	80
52	PS	11	0.00664935	0.0135695	0.00553472	0.000568208	81
58	PS	11	0.0125011	0.0279069	0.0034054	0.000337857	82
60	PS	11	0.000381763	0.0022419	0.00210623	0.000159553	83
61	PS	11	0.0882359	0.0100134	0.00225649	0.02088	84
67	PS	11	0.000889182	0.000738056	0.000568401	6.07546e-05	85
82	PS	11	0.000739961	0.00183923	0.000432702	3.59284e-05	86
91	PS	11	0.000501261	0.00253492	0.000812297	7.62865e-05	87
100	PS	11	0.000376628	0.00210148	0.000554543	6.24583e-05	88
101	PS	11	0.00117245	0.00377278	0.000393718	6.05591e-05	89
119	PS	11	0.0075594	0.00273034	0.00135495	5.27945e-05	90
141	PS	11	0.00518358	0.00153376	0.000191532	0.000397264	91
142	PS	11	0.00110311	0.00216328	0.000443259	6.04885e-05	92
143	PS	11	0.00359386	0.00376174	0.175731	0.000101567	93
150	PS	11	0.000601754	0.000349995	0.000424041	4.83778e-05	94
19	PUR	12	0.00884304	0.0813941	0.0968987	7.29639e-05	95
28	PUR	12	0.00319843	0.50235	0.00255541	4.31377e-05	96
97	PUR	12	0.00154839	0.0138074	8.37535e-05	5.91588e-05	97
3	PVC	13	0.00751672	0.00699305	0.000988251	0.000119204	98
7	PVC	13	0.00136305	0.00218525	0.000615044	0.000103927	99
9	PVC	13	0.00214184	0.00552941	0.00173284	0.000121777	100
10	PVC	13	0.00573659	0.00708724	0.00273867	0.000190649	101
12	PVC	13	0.00420893	0.00399935	0.00176743	5.85431e-05	102
16	PVC	13	0.00501152	0.017136	0.00219779	0.000241543	103
22	PVC	13	0.0313192	0.0259737	0.00162464	0.000912976	104
23	PVC	13	0.0072217	0.026778	0.00993286	0.000633779	105
29	PVC	13	0.00612745	0.0116466	0.00379762	0.000158724	106
30	PVC	13	0.00108973	0.00244315	0.00124242	4.36159e-05	107
31	PVC	13	0.00420718	0.00995786	0.00571489	8.39658e-05	108
34	PVC	13	0.028473	0.0344446	0.015091	0.00209778	109
47	PVC	13	0.188124	66.9092	698.057	0.0932224	110
49	PVC	13	0.00213042	0.00322626	0.00297423	0.000113125	111
78	PVC	13	0.0298471	0.134831	0.00697658	0.000209809	112
94	PVC	13	0.00269217	0.00540897	0.00329937	0.000316261	113
95	PVC	13	0.00237505	0.00736841	0.107975	0.000190448	114
98	PVC	13	0.0017697	0.00657909	0.0037759	0.000345425	115
99	PVC	13	0.00336626	0.00972073	-0.00173743	0.000706141	116
102	PVC	13	0.00160884	0.00194917	0.000285053	3.60311e-05	117
104	PVC	13	0.00902842	0.0210805	0.00384601	0.000201828	118
105	PVC	13	0.00046397	0.00105618	0.00037245	4.66789e-05	119
106	PVC	13	0.00673552	0.0144373	0.00370824	0.000225531	120
107	PVC	13	0.000337054	0.00093358	0.000546985	5.00207e-05	121
108	PVC	13	0.000503843	0.0016371	0.00039891	9.23066e-05	122
115	PVC	13	0.000892689	0.00398703	0.00113191	0.000148993	123
116	PVC	13	12.1847	0.643735	0.00446045	0.000179208	124
117	PVC	13	0.0645407	0.00457506	0.000272447	9.87634e-05	125
118	PVC	13	0.0119158	0.00851911	0.00257425	0.000186884	126
121 bis	PVC	13	0.00173824	0.00140444	-0.000205566	5.8903e-05	127
123	PVC	13	0.0735426	15.5726	0.0456201	3.68619e-06	128
124	PVC	13	0.0496105	0.0567173	0.00038101	5.40629e-05	129
125	PVC	13	0.0451768	0.0428581	0.0463767	0.00192805	130
128	PVC	13	0.0111835	0.00818528	0.00124499	0.000248184	131
129	PVC	13	0.00901077	0.00326055	0.00277505	0.000313589	132
132	PVC	13	0.06636	0.0571765	0.0418149	0.00328714	133
144	PVC	13	0.0196757	0.0108654	0.00162363	0.000167472	134
146	PVC	13	0.000723589	0.000494521	0.00144187	4.60031e-05	135
149	PVC	13	0.00226982	0.00105927	0.011043	0.000427702	136
24	rubber	14	0.00262934	0.53796	0.00347074	0.000310049	137
25	rubber	14	0.00225601	0.0051251	0.00220415	0.000161134	138
21	unknown	0	0.047444	0.00716241	0.00447211	0.000169966	139
37	unknown	0	0.00711256	0.0171819	0.00575256	9.62122e-05	140
55	unknown	0	0.0287569	0.0173739	0.01755	0.000887263	141
77	unknown	0	0.00154776	0.00239606	-1.83408e-05	3.99172e-05	142
110	unknown	0	0.00518741	0.0568975	1.50752	0.00111126	143
113	unknown	0	0.00390275	0.00919769	0.002443	0.000170725	144
color correspond to locations
